# Supplementary material
Source: Research Square preprint supplement (doi:10.21203/rs.3.rs-9626628/v1)
Supplement: Supplementary file 1 [file 0ceec33d59c2281c8cc9227f.pdf]

## Awareness of pregnant women regarding prenatal nutrition and dietary diversity

| Variables                                                                                                                                                          | Categories                                                                                                                                                                   |  |
|--------------------------------------------------------------------------------------------------------------------------------------------------------------------|------------------------------------------------------------------------------------------------------------------------------------------------------------------------------|--|
| Sl. no                                                                                                                                                             |                                                                                                                                                                              |  |
| 1. Age (years)                                                                                                                                                     |                                                                                                                                                                              |  |
| 2. Residence                                                                                                                                                       |                                                                                                                                                                              |  |
| 3. Level of education of pregnant mother                                                                                                                           |                                                                                                                                                                              |  |
| 4. Parity                                                                                                                                                          |                                                                                                                                                                              |  |
| 5. Gestational age of pregnant mother                                                                                                                              | First trimester                                                                                                                                                              |  |
|                                                                                                                                                                    | Second trimester                                                                                                                                                             |  |
|                                                                                                                                                                    | Third trimester                                                                                                                                                              |  |
| 6. Occupation of pregnant mothers                                                                                                                                  | Housewife                                                                                                                                                                    |  |
|                                                                                                                                                                    | Employed                                                                                                                                                                     |  |
| 7. Have you been counselled regarding importance of nutrition during pregnancy                                                                                     | Yes                                                                                                                                                                          |  |
|                                                                                                                                                                    | No                                                                                                                                                                           |  |
| 8. Who provided you the guidance regarding nutrition during pregnancy                                                                                              | Doctor                                                                                                                                                                       |  |
|                                                                                                                                                                    | Nurse                                                                                                                                                                        |  |
|                                                                                                                                                                    | Dietician                                                                                                                                                                    |  |
|                                                                                                                                                                    | Family member                                                                                                                                                                |  |
|                                                                                                                                                                    | Community health care workers- (Community health officers (CHOs), Accredited social health activists (ASHAs), Primary health care officers (PHCOs), Anganwadi workers (AWWs) |  |
| 9. Have you been registered under PMSMA(pradhan mantri surakshit matritva abhiyan) and provided with mother and child protection card and safe motherhood booklet. | Yes                                                                                                                                                                          |  |
|                                                                                                                                                                    | No                                                                                                                                                                           |  |

1. What makes a balanced diet during pregnancy?
  - a) Eating enough food
  - b) Eating a variety of foods
  - c) Both of the above
2. Which nutrients are most important for you and your baby's health?
  - a) I know which ones are important
  - b) I think nutrients are important but not sure which ones
  - c) I believe my regular diet is enough
3. How many different types of food should you include daily for a healthy pregnancy?
  - a) 3–4 food groups
  - b) 5–7 food groups
  - c) I don't know
4. Weight gain during pregnancy should be based on:
  - a) Any weight gain is fine
  - b) It depends on pre-pregnancy weight and trimester
  - c) I don't know
5. Which foods provide high-quality protein for pregnancy?
  - a) Pulses and Animal Sources
  - b) Fruits and Vegetables
  - c) I don't know
6. How much salt should a pregnant woman consume daily?
  - a) 1 teaspoon (5g)
  - b) 1 tablespoon (15g)
  - c) I don't know
7. Which foods are rich in Omega-3, important for baby's brain development?
  - a) Fish, nuts, and seeds
  - b) Fruits, cereals, and milk
  - c) I don't know
8. How often should pregnant women eat green leafy vegetables?
  - a) Once a week
  - b) At least once a day
  - c) I don't know
9. Which food group helps meet calcium needs during pregnancy?
  - a) Egg
  - b) Milk
  - c) I don't know
10. How many servings of dairy should you consume per day for adequate calcium?
  - a) 2 servings
  - b) 4 servings
  - c) I don't know

11. Which foods are rich in Vitamin A for baby's growth and vision?
  - a) Carrots, pumpkin, liver, dairy
  - b) Rice, wheat, pulses
  - c) I don't know
12. What is the best way to maintain Vitamin D levels during pregnancy?
  - a) Sunlight exposure
  - b) Eating fruits and vegetables
  - c) I don't know
13. Which foods are rich in folate, important for preventing birth defects?
  - a) Milk and cereals
  - b) Legumes and greens
  - c) I don't know
14. Which nutrients help prevent anemia during pregnancy?
  - a) Iron, folic acid, vitamin B12
  - b) Calcium, iron, folic acid
  - c) I don't know
15. What improves iron absorption in the body?
  - a) Vitamin C
  - b) Calcium
  - c) I don't know
16. Can drinking tea or coffee with meals affect iron absorption?
  - a) Yes
  - b) No
  - c) I don't know
17. Should pregnant women follow specific timing recommendations when consuming iron-folic acid and calcium supplements for maximum benefit?
  - a) Yes
  - b) No
  - c) I don't know
18. When should calcium supplements be taken for better absorption?
  - a) After meals
  - b) On an empty stomach
  - c) I don't know
19. When should iron-folic acid supplements be taken for better absorption?
  - a) After a meal
  - b) Before a meal
  - c) I don't know
20. If you feel nauseous during pregnancy, what is the best way to eat?
  - a) Drink only liquids
  - b) Eat small, frequent meals
  - c) Eat three large meals

21. Can including fiber-rich foods help relieve constipation?
- a) Yes
  - b) No
  - c) I don't know
22. Do potassium-rich fruits help manage blood pressure in pregnancy?
- a) Yes
  - b) No
  - c) I don't know
23. Can honey and jaggery be consumed in gestational diabetes?
- a) Yes
  - b) No
  - c) I don't know
24. Does choosing whole grains help manage blood sugar in gestational diabetes?
- a) Yes
  - b) No
  - c) I don't know
25. If diagnosed with gestational diabetes, should rice be avoided completely?
- a) Yes
  - b) No
  - c) I don't know
26. What is your opinion on receiving diet counseling during pregnancy?
- a) It is essential, and I follow professional advice
  - b) I trust my family elders and follow cultural food practices
  - c) I think it is helpful but not sure if necessary
