# Supplementary material
Source: Research Square preprint supplement (doi:10.21203/rs.3.rs-9626628/v1)
Supplement: Supplementary file 2 [file f5fe24c487e7d5dad454132d.docx]

# STROBE Checklist – Cross-Sectional Study

| Section/Item | STROBE Recommendation | Reported (Yes/No) | Section in Manuscript | Page No. |
| --- | --- | --- | --- | --- |
| Title & Abstract (1a,1b) | Indicate study design in title/abstract; provide balanced summary. | Yes | Title, Abstract | Page 1–2 |
| Background/Rationale (2) | Explain scientific background and rationale. | Yes | Background | Page 4–7 |
| Objectives (3) | State specific objectives. | Yes | End of Background | Page 7 |
| Study Design (4) | Present key elements of study design early. | Yes | Methodology | Page 7 |
| Setting (5) | Describe setting, locations, relevant dates. | Yes | Methodology | Page 7 |
| Participants (6) | Eligibility criteria and selection methods. | Yes | Methodology | Page 7–8 |
| Variables (7) | Clearly define outcomes and exposures. | Yes | Data Collection | Page 8–9 |
| Data Sources/Measurement (8) | Provide details of measurement tools. | Yes | Data Collection | Page 8–9 |
| Bias (9) | Describe efforts to address bias. | Yes | Strengths & Limitations | Page 18 |
| Study Size (10) | Explain how study size was determined. | Yes | Sample Size Calculation | Page 8 |
| Quantitative Variables (11) | Explain handling of quantitative variables. | Yes | Statistical Analysis | Page 9 |
| Statistical Methods (12) | Describe statistical methods. | Yes | Statistical Analysis | Page 8–10 |
| Participants – Results (13) | Report numbers at each stage. | Yes | Results – Table 1 | Page 9–10 |
| Descriptive Data (14) | Participant characteristics. | Yes | Table 1 & Results | Page 9–10 |
| Outcome Data (15) | Report outcome measures. | Yes | Table 2, Figure 1 | Page 11–13 |
| Main Results (16) | Provide estimates with precision. | Yes | Results – Statistical tests | Page 11–14 |
| Other Analyses (17) | Report subgroup analyses. | Yes | Table 3 | Page 13 |
| Key Results (18) | Summarise key findings. | Yes | Discussion | Page 14-16 |
| Limitations (19) | Discuss limitations. | Yes | Strengths & Limitations | Page 18 |
| Interpretation (20) | Provide overall interpretation. | Yes | Discussion | Page 14–18 |
| Generalisability (21) | Discuss external validity. | Yes | Strengths & Limitations | Page 18 |
| Funding (22) | State funding sources. | Yes | Funding section | Page 20 |
